# Supplementary material for: Psychometric Evaluation of the Krogh-Poulsen Test for the Diagnosis of the Temporomandibular Disorders
Source: MDPI journal article supplement (doi:10.3390/diagnostics11101876), 2021-10-12
Supplement: s1 [file s1]

# Psychometric Evaluation of the Krogh-Poulsen Test for the Diagnosis of the Temporomandibular Disorders

Table S1. Krogh Poulsen Test.

| Signs and Symptoms                                                             | Yes | No |
|--------------------------------------------------------------------------------|-----|----|
| I. Mouth opening under 40 mm                                                   |     |    |
| II. Deviation in mandibular movement during opening or closing                 |     |    |
| III. Discomfort at masticatory muscles palpation                               |     |    |
| IV. Pain at pressing temporomandibular joint                                   |     |    |
| V. Clicks or crackles during joint movement                                    |     |    |
| VI. Obstacles or blockages while joint movement                                |     |    |
| VII. Centric relation and intercuspation                                       |     |    |
| VIII. Anterior displacement over 1 mm at retrusion from maximum intercuspation |     |    |
| IX. Lateral displacement over 1 mm at retrusion                                |     |    |

Unaffected \_\_\_\_\_ No positive aspect  
 Disturbance \_\_\_\_\_ One positive aspect  
 Risk \_\_\_\_\_ Two positive aspects  
 Dysfunction \_\_\_\_\_ Three positive aspects  
 Items 6 or 9 positive (them are decisive)
